# Supplementary material for: Asymmetric alkyl diamine based Dion–Jacobson low-dimensional perovskite solar cells with efficiency exceeding 15%
Source: Royal Society of Chemistry journal article supplement (doi:10.1039/d0ta02706e), 2020-01-01
Supplement: d0ta02706e1.pdf [file d0ta02706e1.pdf]

ARTICLE

## Supporting information

### Asymmetric Alkyl Diamine Based Dion-Jacobson Low-Dimensional Perovskite Solar Cells with Efficiency Exceeding 15%

Weidong Zhao,<sup>a</sup> Qingshun Dong,<sup>\*a</sup> Jiangwei Zhang,<sup>\*b</sup> Shi Wang,<sup>a</sup> Min Chen,<sup>c</sup> Chunyi Zhao,<sup>d</sup> Mingyu Hu,<sup>c</sup> Shengye Jin,<sup>d</sup> Nitin P. Padture,<sup>c</sup> and Yantao Shi<sup>\*a</sup>

<sup>a</sup>State Key Laboratory of Fine Chemicals, Department of Chemistry, School of Chemical Engineering, Dalian University of Technology, Dalian, 116024, China. Email: dongqs@dlut.edu.cn; shiyantao@dut.edu.cn

<sup>b</sup>State Key Laboratory of Catalysis, Dalian Institute of Chemical Physics, Chinese Academy Sciences Dalian, 116023, China. Email: jwzhang@dicp.ac.cn

<sup>c</sup>School of Engineering, Brown University, Providence, Rhode Island 02912, United States.

<sup>d</sup>State Key Laboratory of Molecular Reaction Dynamics, Dalian Institute of Chemical Physics, Chinese Academy of Sciences, Dalian, 116023, China.

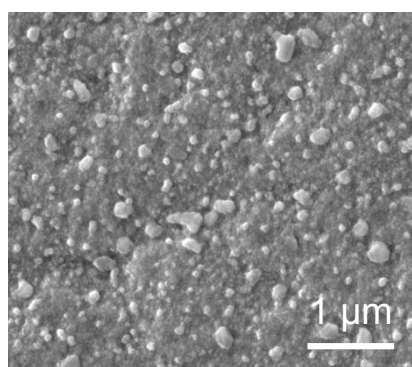

**Fig. S1.** Top-view SEM images of the (DMAPA)PbI<sub>4</sub> perovskite film.

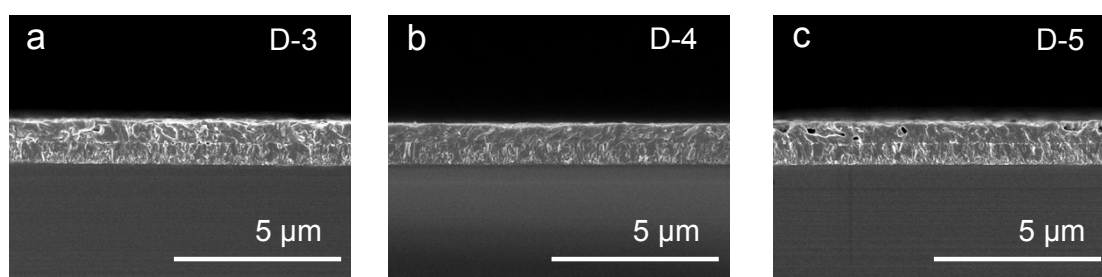

**Fig. S2.** Wide range cross-sectional SEM images of the D-3 (a), D-4 (b) and D-5 (c) perovskite films, respectively.

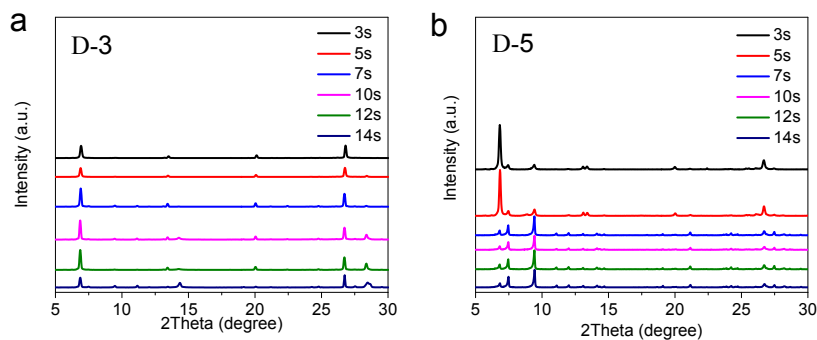

**Fig. S3.** XRD pattern of D-3 (a) and D-5 (b) films at the deposition time of 3s, 5s, 7s, 10s, 12s, 14s, respectively.

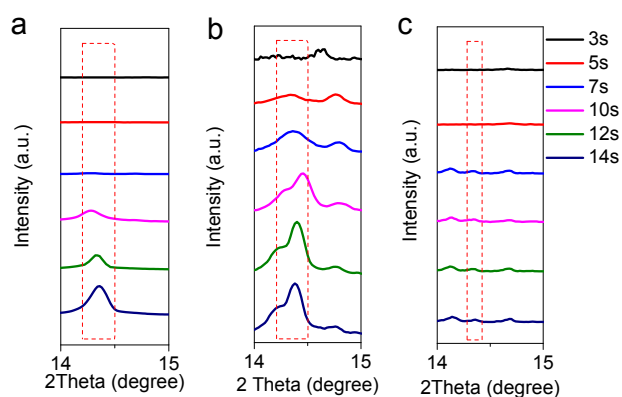

**Fig. S4.** Detail XRD peak evolution at 14.4° for the D-3 (a), D-4 (b) and D-5 (c) perovskite films, respectively.

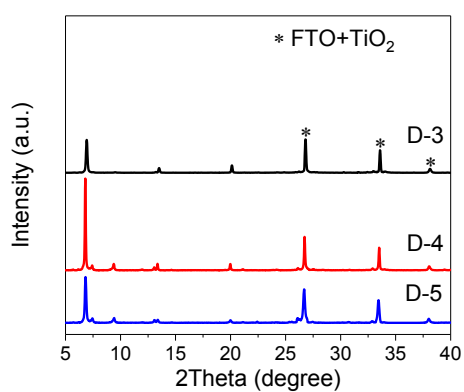

**Fig. S5.** XRD patterns for the D-3, D-4, and D-5 films collected at 3 s after the start of hot casting.

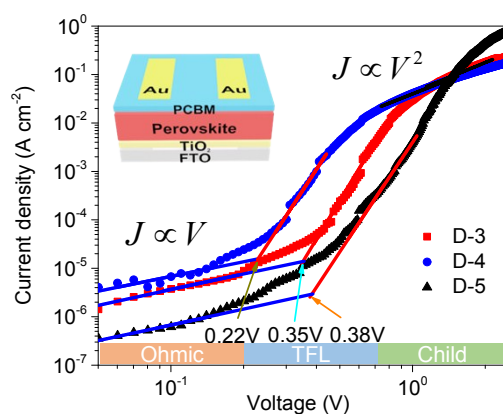

**Fig. S6.** Space-charge limited current of the electron only devices for the D-3, D-4, and D-5 perovskite films. Insert: device structure of the electron only device.

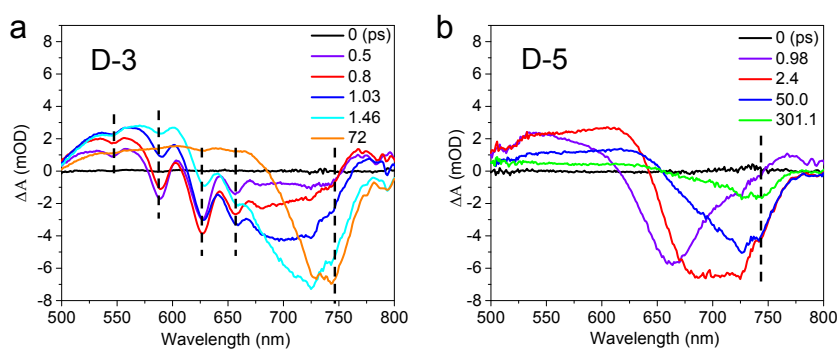

**Fig. S7.** Transient absorption (TA) spectra with various delay times for D-3 (a) and D-5 (b) perovskite films, respectively.

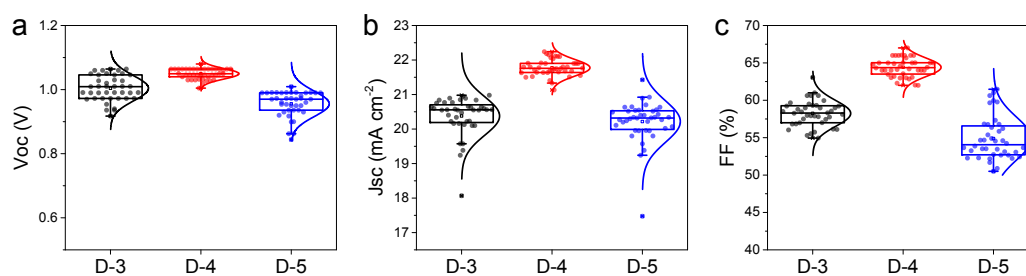

**Fig. S8.** Statistics of the  $V_{oc}$  (a),  $J_{sc}$  (b) and FF (c) from the photovoltaic parameters of the devices based on D-3, D-4, and D-5 DMAPA LD perovskites, respectively.

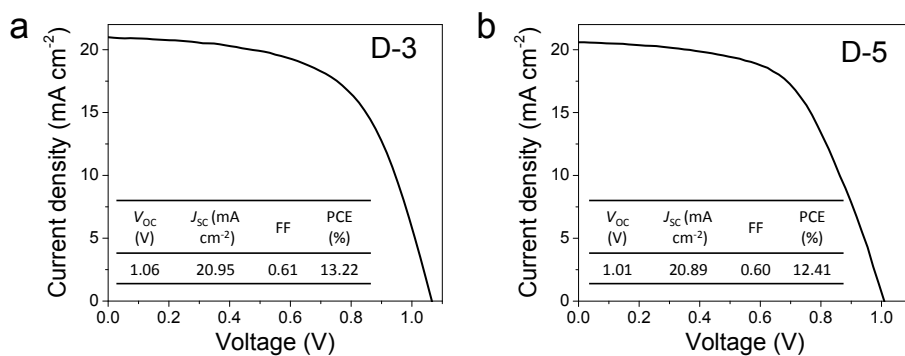

**Fig. S9.** Champion  $J$ - $V$  curves for the D-3 (a) and D-5 (b) perovskite devices.

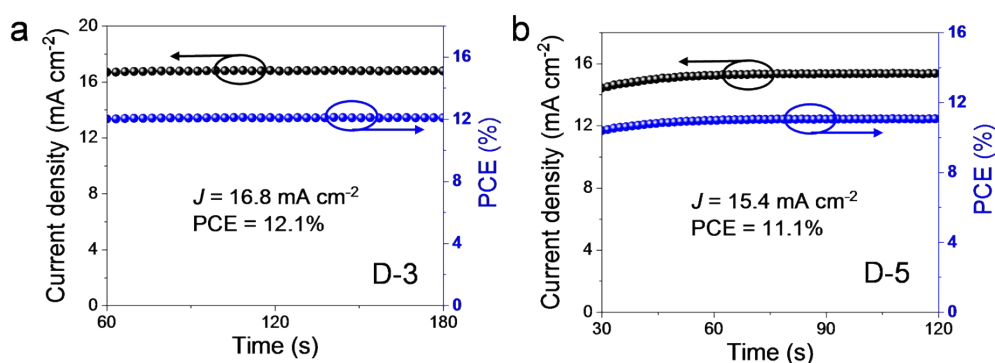

**Fig. S10.** Stabilized power outputs and current densities at maximum power point for the D-3 (a) and D-5 (b) LD perovskite solar cells.

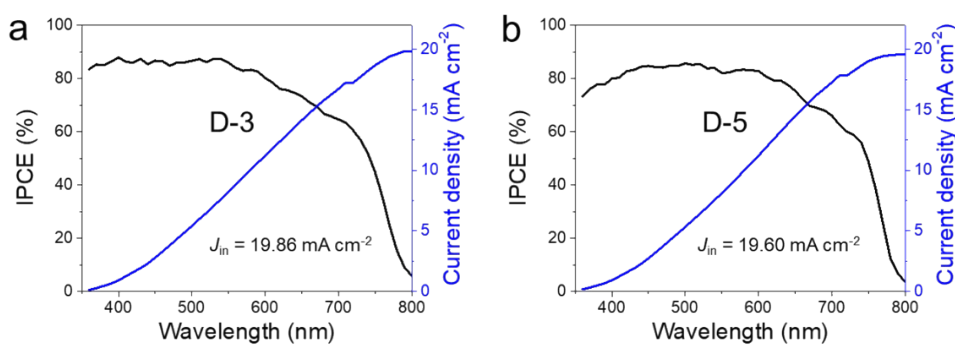

**Fig. S11.** IPCE spectrum and integrated short circuit current density as a function of wavelength for the D-3 and D-5 LD PSCs, respectively.

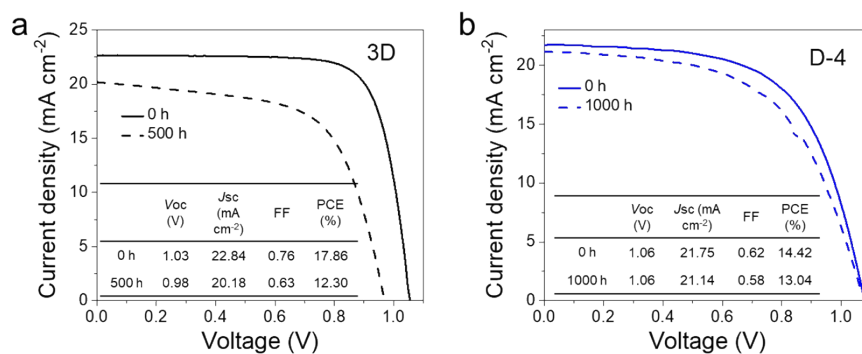

**Fig. S12.** The  $J$ - $V$  curves and related photovoltaic parameters of the devices based on 3D (a) and D-4 (b) perovskite before and after thermal aging in air.

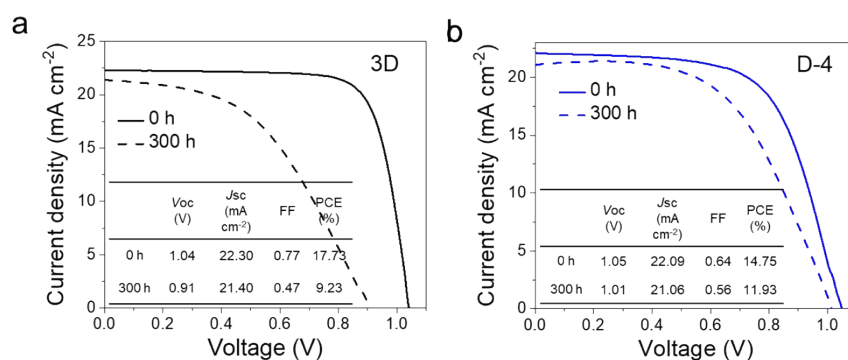

**Fig. S13.** The  $J$ - $V$  curves and related photovoltaic parameters of the devices based on 3D (a) and D-4 (b) perovskite before and after the 300-hour 1 sun illumination in air.

**Table S1.** Crystal Data and Structure Refinement for (DMAPA)PbI<sub>4</sub>.

|                                             |                                                                 |
|---------------------------------------------|-----------------------------------------------------------------|
| Empirical formula                           | C <sub>5</sub> H <sub>16</sub> I <sub>4</sub> N <sub>2</sub> Pb |
| Crystal system                              | orthorhombic                                                    |
| Space group                                 | Pbca                                                            |
| a/Å                                         | 18.435(2)                                                       |
| b/Å                                         | 8.6432(12)                                                      |
| c/Å                                         | 20.797(4)                                                       |
| α/°                                         | 90                                                              |
| β/°                                         | 90                                                              |
| γ/°                                         | 90                                                              |
| Volume(Å <sup>3</sup> )                     | 3313.7(9)                                                       |
| Z                                           | 8                                                               |
| Density (g cm <sup>-3</sup> )               | 3.283                                                           |
| Reflections collected                       | 3988                                                            |
| Independent reflections                     | 3815 [Rint = 0.0235, Rsigma = 0.0438]                           |
| Data/restraints/parameters                  | 3815/45/113                                                     |
| Final R indexes [I>=2σ (I)]                 | R1 = 0.0311, wR2 = 0.0648                                       |
| Final R indexes [all data]                  | R1 = 0.0475, wR2 = 0.0718                                       |
| Largest diff. peak/hole / e Å <sup>-3</sup> | 0.75/-0.58                                                      |

**Table S2.** Parameters of the TRPL spectroscopy of the D-3, D-4, and D-5 perovskite.

| Samples | τ <sub>ave</sub> (ns) | τ <sub>1</sub> (ns) | τ <sub>2</sub> (ns) | A <sub>1</sub> | A <sub>2</sub> |
|---------|-----------------------|---------------------|---------------------|----------------|----------------|
| D-3     | 18.4                  | 6.38                | 23.9                | 0.634          | 0.37           |
| D-4     | 34.5                  | 8                   | 40.9                | 0.54           | 0.436          |
| D-5     | 5.6                   | 0.824               | 7.48                | 0.81           | 0.235          |

**Table S3.** The average and champion photovoltaic parameters of solar cells based on D-3, D-4, and D-5 DMAPA LD perovskites.

| Samples |          | $V_{oc}$ (V) | $J_{sc}$ (mA cm <sup>-2</sup> ) | FF           | PCE (%)      |
|---------|----------|--------------|---------------------------------|--------------|--------------|
| D-3     | Average  | 1.0 ± 0.04   | 20.38 ± 0.55                    | 0.58 ± 0.017 | 11.91 ± 0.68 |
|         | Champion | 1.06         | 20.95                           | 0.61         | 13.22        |
| D-4     | Average  | 1.04 ± 0.02  | 21.90 ± 0.21                    | 0.64 ± 0.011 | 14.71 ± 0.33 |
|         | Champion | 1.08         | 22.04                           | 0.65         | 15.16        |
| D-5     | Average  | 0.96 ± 0.04  | 20.22 ± 0.60                    | 0.55 ± 0.038 | 10.6 ± 0.68  |
|         | Champion | 1.01         | 20.89                           | 0.60         | 12.41        |
